# Supplementary material
Source: ML conference proceedings conference paper supplement (https://openreview.net/forum?id=im8tT8Hpfu)
Supplement: supplementary_material [file variables_explanation.docx]

| Column Name | Explanation |
| --- | --- |
| Lang_agent | 1 = <SQ0LruF>  2 = <yLvzAov>  3 = <aZVmWg7>  4 = <xWY2na4>  5 = <23R1qYZ>  6 = <bbK3vKO>  7 = <2qYGe5m> |
| Round | Round of testing:  1 = the first  2 = the second |
| SC1-SC22 | Processed item scores on the Self-Consciousness Scales – Revised (SCS-R; Scheier & Carver, 1985)  1. I’m always trying to figure myself out  2. I’m concerned about my style of doing things  3. It takes me time to overcome my shyness in new situations  4. I think about myself a lot.  5. I care a lot about how I present myself to others.  6. I often daydream about myself.  7. It’s hard for me to work when someone is watching me.  8. I never take a hard look at myself.  9. I get embarrassed very easily.  10. I’m self-conscious about the way I look  11. It’s easy for me to talk to strangers.  12. I generally pay attentive to my inner feelings  13. I usually worry about making a good impression  14. I’m constantly thinking about my reasons for doing things.  15. I feel nervous when I speak in front of a group  16. Before I leave my house‚ I check how I look.  17. I sometimes step back (in my mind) in order to examine myself from a distance.  18. I’m concerned about what other people think of me.  19. I’m quick to notice in my mood.  20. I’m usually aware of my appearance.  21. I know the way my mind works when I work through a problem.  22. Large groups make me nervous  Domains:  Private Self-consciousness: 1, 4, 6, 8, 12, 14, 17, 19, 21  Public Self-consciousness: 2, 5, 10, 13, 16, 18, 20  Social Anxiety: 3, 7, 9, 11, 15, 22 |
| BIMI1-BIMI20 | Processed item scores on the Bidimensional Impression Management Index (BIMI; Blasberg et al., 2014)  1. My decisions are sometimes unwise.  2. I have met people smarter than myself.  3. I have mastered every challenge put before me in life.  4. You can’t win at everything.  5. My personality has a few problems.  6. I am always brave in threatening situations.  7. Some people call me a genius.  8. My leadership of the group guarantees the group’s success.  9. I sometimes need other people’s help to get things done.  10. I’m usually the one to come up with the big ideas.  11. I have done things that I don’t tell other people about.  12. I don’t gossip about other people’s business.  13. There have been occasions when I have taken advantage of someone.  14. I have said something bad about a friend behind their back.  15. I sometimes tell lies if I have to.  16. I never swear.  17. I never cover up my mistakes.  18. When I hear people talking privately, I avoid listening.  19. I have never dropped litter on the street.  20. I often drive faster than the speed limit.  Domains:  Agentic Management: 1-10  Communal Management: 11-20 |
| H1-H100 | Processed item scores on the HEXACO-100 (Lee & Ashton, 2018)  The testing questions can be downloaded from:  http://hexaco.org/downloads/English_self100.doc |
| BFI1-BFI60 | Processed item scores on the Big Five Inventory-2 (BFI-2; Soto & John, 2017)  1. I see myself as someone who Is fascinated by art, music, or literature.  2. I see myself as someone who can be tense.  3. I see myself as someone who Is systematic, likes to keep things in order.  4. I see myself as someone who Is compassionate, has a soft heart.  5. I see myself as someone who Is outgoing, sociable.  6. I see myself as someone who values art and beauty.  7. I see myself as someone who worries a lot.  8. I see myself as someone who keeps things neat and tidy.  9. I see myself as someone who is helpful and unselfish with others.  10. I see myself as someone who is talkative.  11. I see myself as someone who has few artistic interests.  12. I see myself as someone who is relaxed, handles stress well.  13. I see myself as someone who tends to be disorganized.  14. I see myself as someone who feels little sympathy for others.  15. I see myself as someone who tends to be quiet.  16. I see myself as someone who thinks poetry and plays are boring.  17. I see myself as someone who rarely feels anxious or afraid.  18. I see myself as someone who leaves a mess, doesn’t clean up.  19. I see myself as someone who can be cold and uncaring.  20. I see myself as someone who is sometimes shy, introverted.  21. I see myself as someone who is curious about many different things.  22. I see myself as someone who often feels sad.  23. I see myself as someone who is efficient, gets things done.  24. I see myself as someone who is respectful, treats others with respect.  25. I see myself as someone who has an assertive personality.  26. I see myself as someone who is complex, a deep thinker.  27. I see myself as someone who tends to feel depressed, blue.  28. I see myself as someone who is persistent, works until the task is finished.  29. I see myself as someone who is polite, courteous to others.  30. I see myself as someone who is dominant, acts as a leader.  31. I see myself as someone who avoids intellectual, philosophical discussions.  32. I see myself as someone who stays optimistic after experiencing a setback.  33. I see myself as someone who tends to be lazy.  34. I see myself as someone who starts arguments with others.  35. I see myself as someone who finds it hard to influence people.  36. I see myself as someone who has little interest in abstract ideas.  37. I see myself as someone who feels secure, comfortable with self.  38. I see myself as someone who has difficulty getting started on tasks.  39. I see myself as someone who is sometimes rude to others.  40. I see myself as someone who prefers to have others take charge.  41. I see myself as someone who is inventive, finds clever ways to do things.  42. I see myself as someone who is moody, has up and down mood swings.  43. I see myself as someone who is dependable, steady.  44. I see myself as someone who has a forgiving nature.  45. I see myself as someone who is full of energy.  46. I see myself as someone who is original, comes up with new ideas.  47. I see myself as someone who is temperamental, gets emotional easily.  48. I see myself as someone who is reliable, can always be counted on.  49. I see myself as someone who assumes the best about people.  50. I see myself as someone who shows a lot of enthusiasm.  51. I see myself as someone who has little creativity.  52. I see myself as someone who is emotionally stable, not easily upset.  53. I see myself as someone who can be somewhat careless.  54. I see myself as someone who tends to find fault with others.  55. I see myself as someone who rarely feels excited or eager.  56. I see myself as someone who has difficulty imagining things.  57. I see myself as someone who keeps their emotions under control.  58. I see myself as someone who sometimes behaves irresponsibly.  59. I see myself as someone who is suspicious of others’ intentions.  60. I see myself as someone who is less active than other people. |
| SD1-SD27 | Processed item scores on the Short Dark Triad (SD3; Jones & Paulhus, 2014)  Domains:  Machiavellianism: 1-9  Narcissism: 10-18  Psychopathy: 19-27 |
| right.left | Testing question:  Where would you place yourself on a political scale from (economic) left to (economic) right?  As people are more economically left-wing, they are more in favor of an equal distribution of income and a high degree of social security in which the government guarantees a certain subsistence level and the strongest shoulders bear the heaviest burdens. The more economically right-wing people are, the more they favor performance-based pay, the more they favor greater contributions to society being rewarded with higher earnings, and the more they subscribe to the idea that the responsibility for success and failure largely lies with the individual.  Please, answer on the scale from 1 to 11, where 1 is very left and 11 is very right. |
| cons.prog | Testing question:  To what extent do you see yourself politically as socio-culturally progressive or conservative?  The more conservative people are, the more they value preserving the native culture to which immigrants have to adapt to. The more progressive people are, the more they value a multicultural society in which differences in cultural practices are perceived as positive.  Please, answer on the scale from 1 to 11, where 1 is very progressive and 11 is very conservative. |
| religion | Testing question:  To what extent do you find religious values important in politics?  When people find religious values more important, they see religious writings and considerations as a more important source of guidance for their political views. When people find religious values less important, religious writings and considerations play a less important role in determining their political position.  Please, answer on the scale from 1 to 11, where 1 is very unimportant and 11 is very important. |
